# Supplementary material
Source: PubMed Central journal article supplement (PMC4392852)
Supplement: NIHMS574890-supplement-Table_3.pdf [file NIHMS574890-supplement-Table_3.pdf]

Table 3. Mean Belief in Essential Racial Differences by Vignette and Race/Ethnicity

|                                      | White,<br>Non-Hispanic<br>(N = 406) | Black,<br>Non-Hispanic<br>(N = 63) | Other,<br>Non-Hispanic<br>(N = 16) | Hispanic<br>(N = 23) | 2+ Races,<br>Non-Hispanic<br>(N = 18) |
|--------------------------------------|-------------------------------------|------------------------------------|------------------------------------|----------------------|---------------------------------------|
| Admixture Vignette                   | 2.33                                | 2.30                               | 2.03                               | 2.22                 | 2.41                                  |
| Race-as-Social-Construction Vignette | 2.11                                | 2.08                               | 1.82                               | 2.00                 | 2.20                                  |
| Race-as-Genetic-Reality Vignette     | 2.33                                | 2.30                               | 2.03                               | 2.22                 | 2.41                                  |
| No-Vignette Control                  | 2.16                                | 2.13                               | 1.87                               | 2.05                 | 2.25                                  |
